# Supplementary material for: Self-assembled Cu(ii) and Ni(ii) metallamacrocycles formed from 3,3,3′,3′-tetrabenzyl-1,1′-aroylbis(thiourea) ligands: DNA and protein binding studies, and cytotoxicity of trinuclear complexes
Source: Royal Society of Chemistry journal article supplement (doi:10.1039/c4dt01859a), 2014-01-01
Supplement: c4dt01859a1.pdf [file c4dt01859a1.pdf]

## Self-assembled Cu(II) and Ni(II) metallamacrocycles formed from 3,3,3',3'-tetrabenzyl-1,1'-aroylbis(thiourea) ligands: DNA and protein binding studies, and cytotoxicity of trinuclear complex

Nagamani Selvakumaran, Nattamai S.P. Bhuvanesh and Ramasamy Karvembu

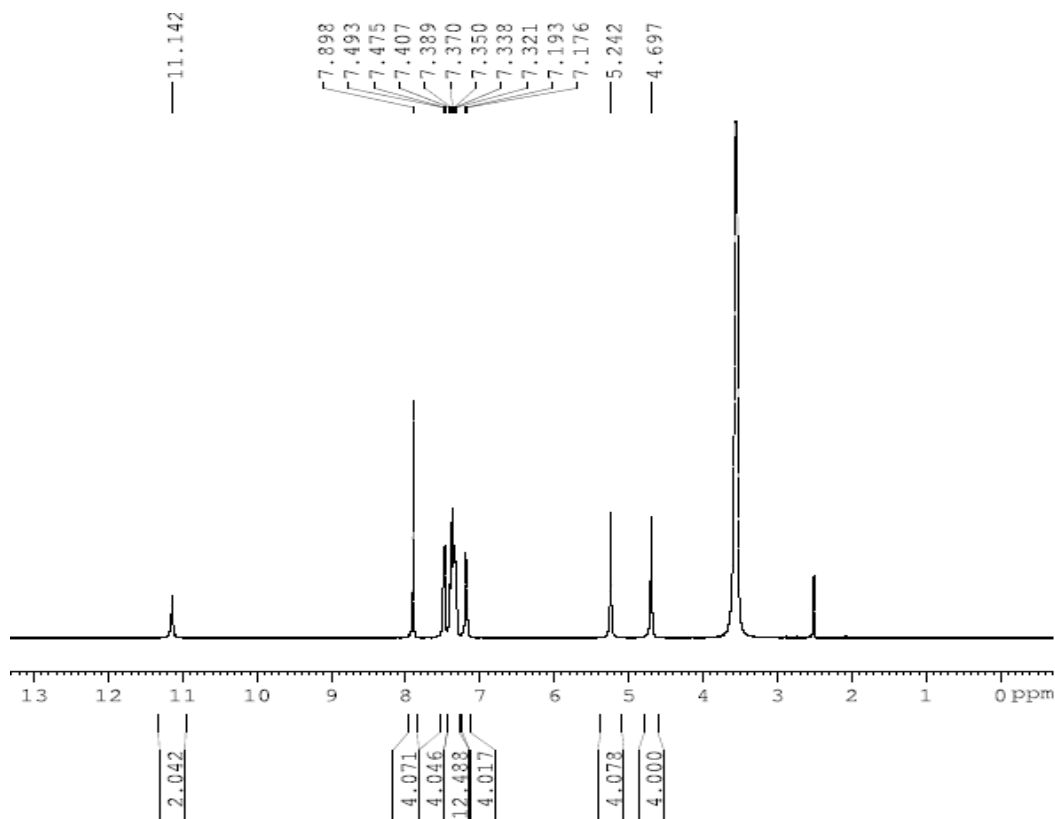

Fig. S1  $^1\text{H}$  NMR spectrum of  $\text{H}_2\text{L1}$ .

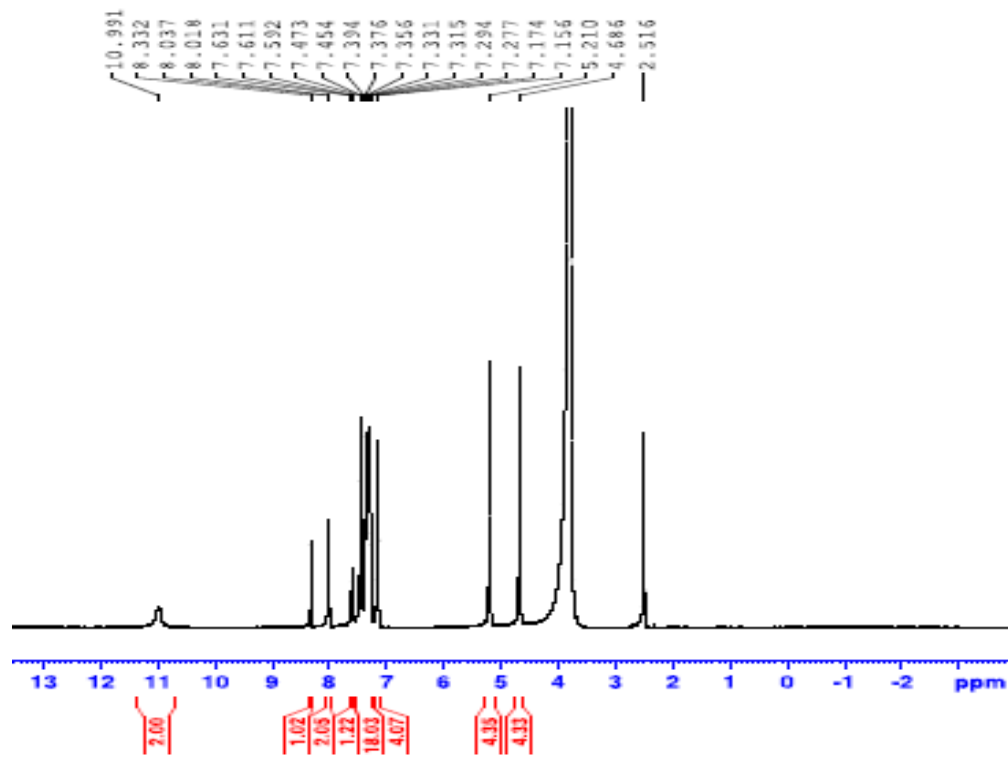

Fig. S2  $^1\text{H}$  NMR spectrum of  $\text{H}_2\text{L}_2$ .

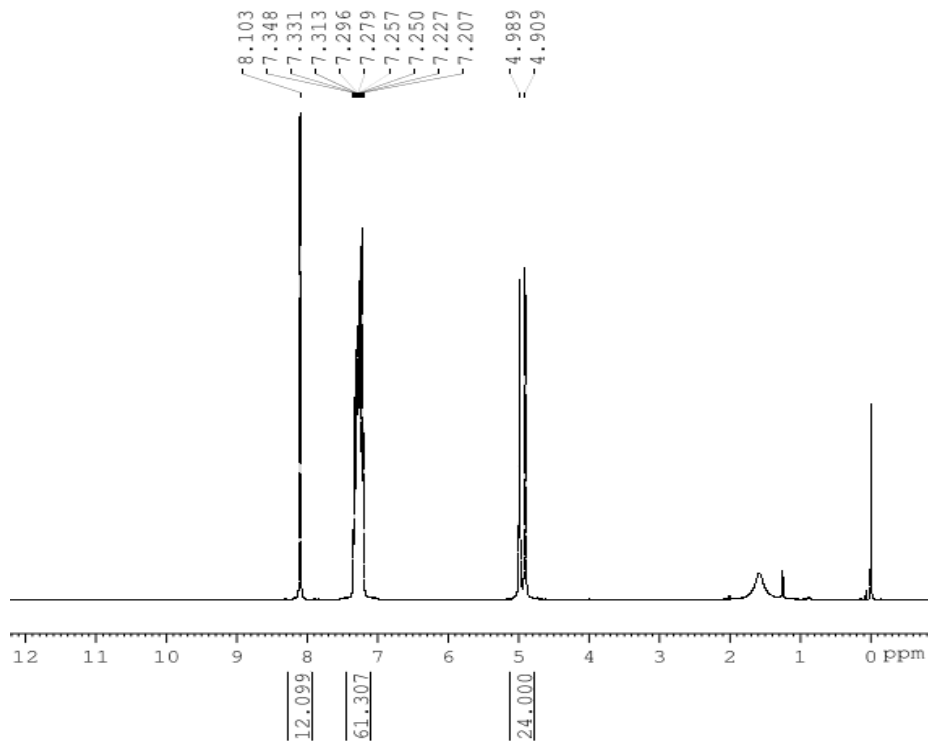

Fig. S3  $^1\text{H}$  NMR spectrum of **2**.

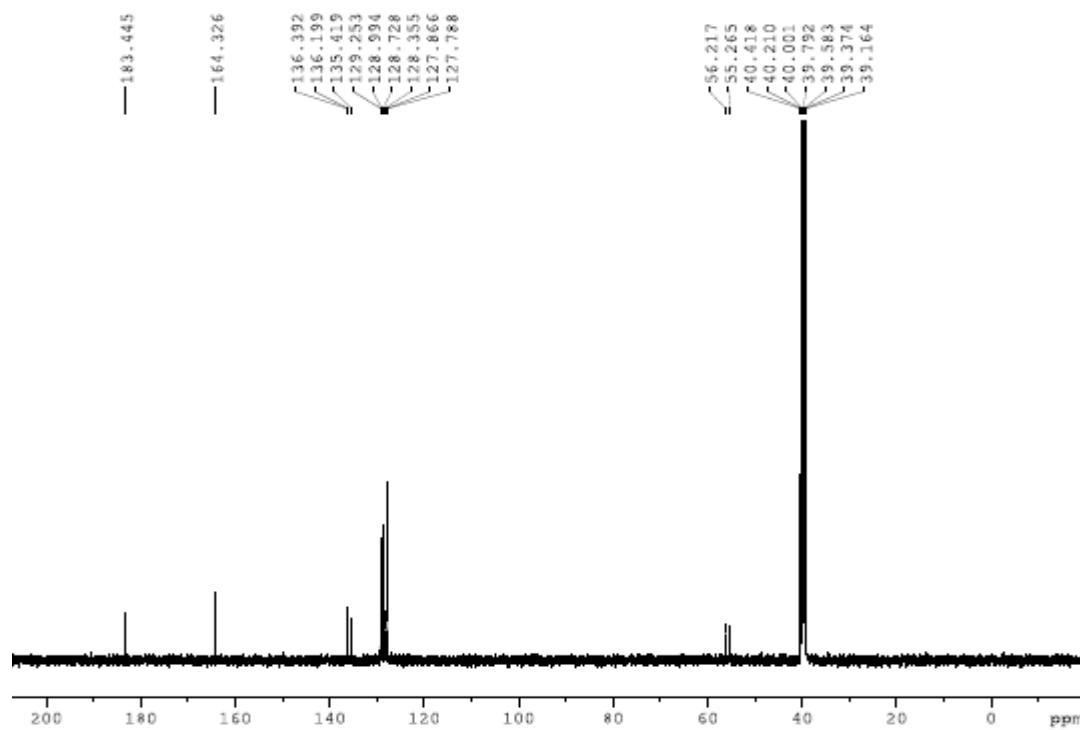

Fig. S4 <sup>13</sup>C NMR spectrum of H<sub>2</sub>L1.

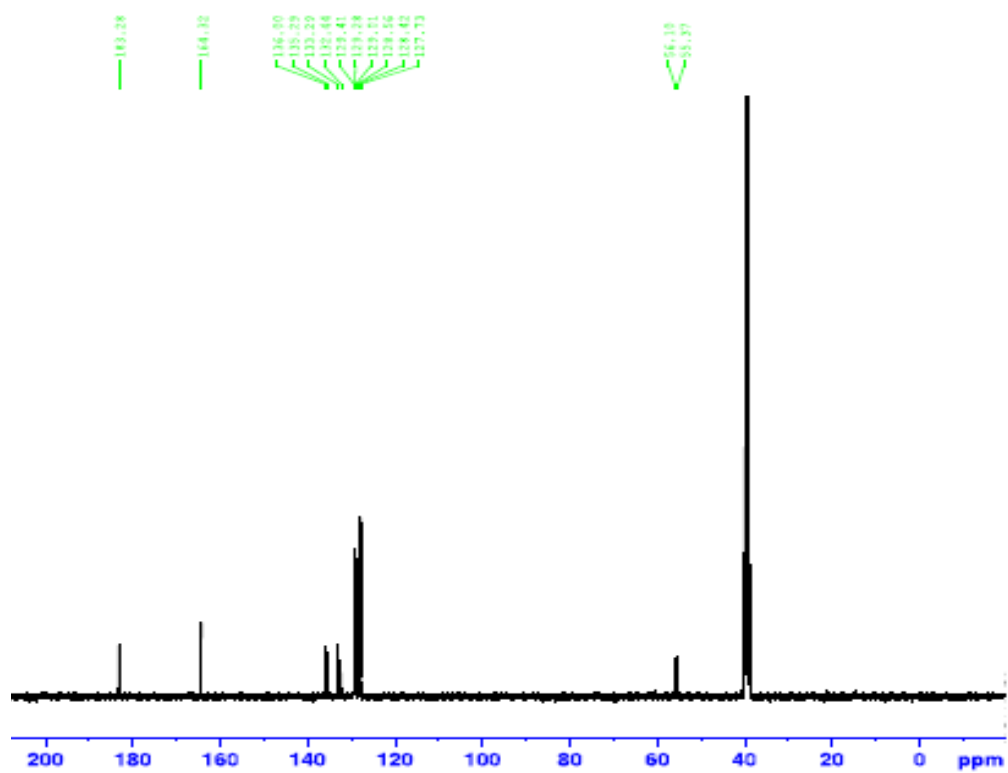

Fig. S5 <sup>13</sup>C NMR spectrum of H<sub>2</sub>L2.

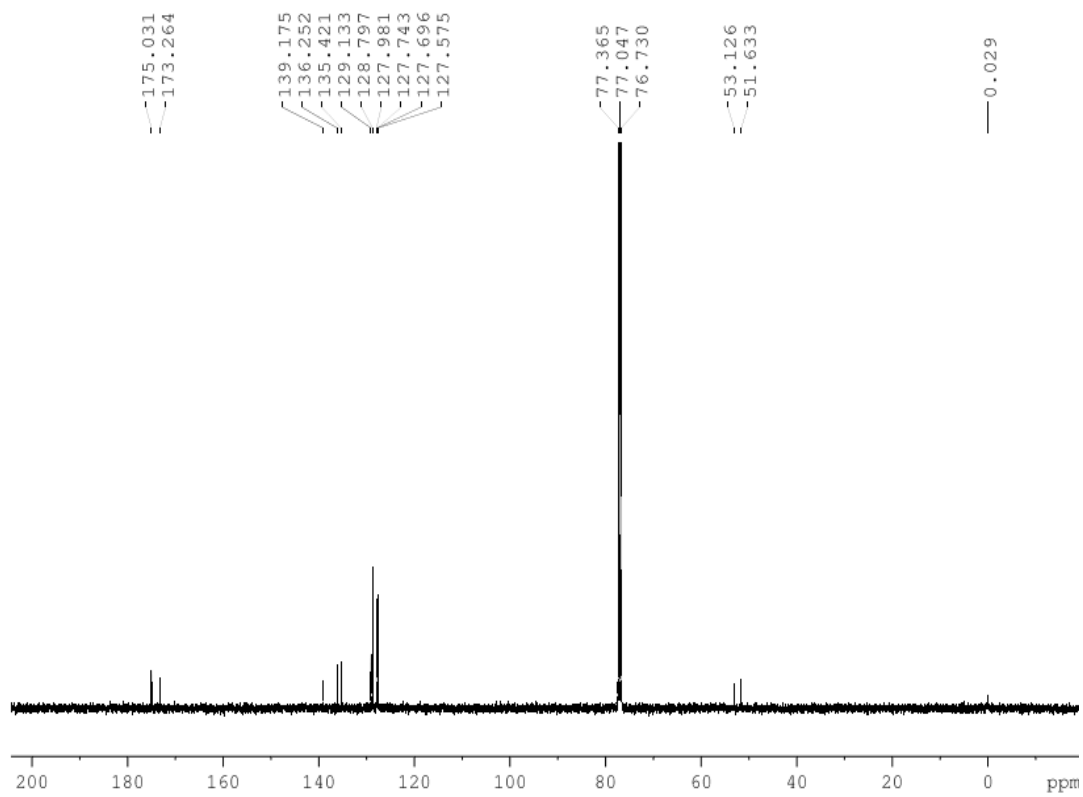

**Fig. S6**  $^{13}\text{C}$  NMR spectrum of **2**.

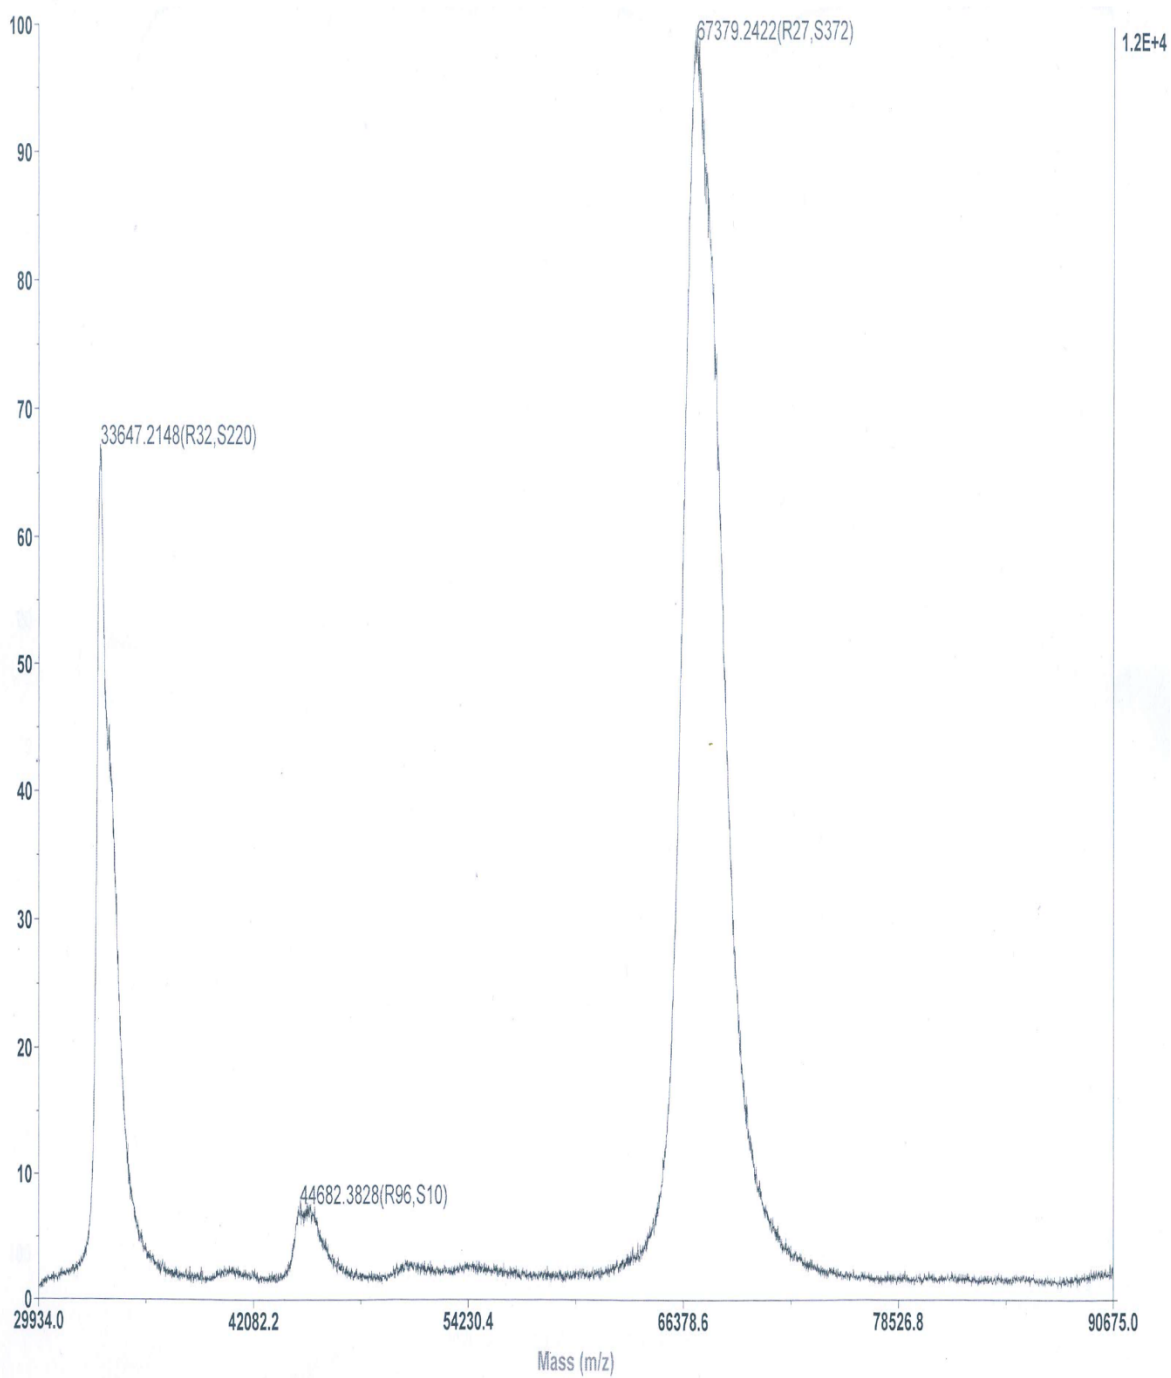

**Fig. S7** MALDI-TOF mass spectrum of **1** + BSA.
